# Supplementary material for: A new impetus for biodesulfurization: bypassing sulfate inhibition in biocatalyst production
Source: Royal Society of Chemistry journal article supplement (doi:10.1039/d3gc01612a), 2023-01-01
Supplement: d3gc01612a1.pdf [file d3gc01612a1.pdf]

### Supplemental information

**Table S1.** Information about the pair of primers used in this study (sequences, melting temperature and amplification efficiency) for the *dszA*, *dszB*, *dszC* and *16S rRNA* genes.

| Genes           | Primer sequences (5'-3') | Melting temperature | Amplification efficiency |
|-----------------|--------------------------|---------------------|--------------------------|
| <i>dszA</i>     | TGGGATTGATGCAGGCTACAT    | 56.5°C              | 2.05                     |
|                 | GCCCCGCAGCCTTCAC         | 60.3°C              |                          |
| <i>dszB</i>     | CCTGCTGGATCGCACACA       | 58.1°C              | 1.89                     |
|                 | CGGGCTCCTGCAGCAA         | 58.9°C              |                          |
| <i>dszC</i>     | TGTTTCGGCTCGCAGGAA       | 57.1°C              | 1.99                     |
|                 | CGTTCTGCGCGATTTGC        | 55.4°C              |                          |
| <i>16S rRNA</i> | CGACCTGAGAGGGTGATC       | 57.1°C              | 1.89                     |
|                 | ATAACCCGCTGGCAATACAG     | 55.2°C              |                          |

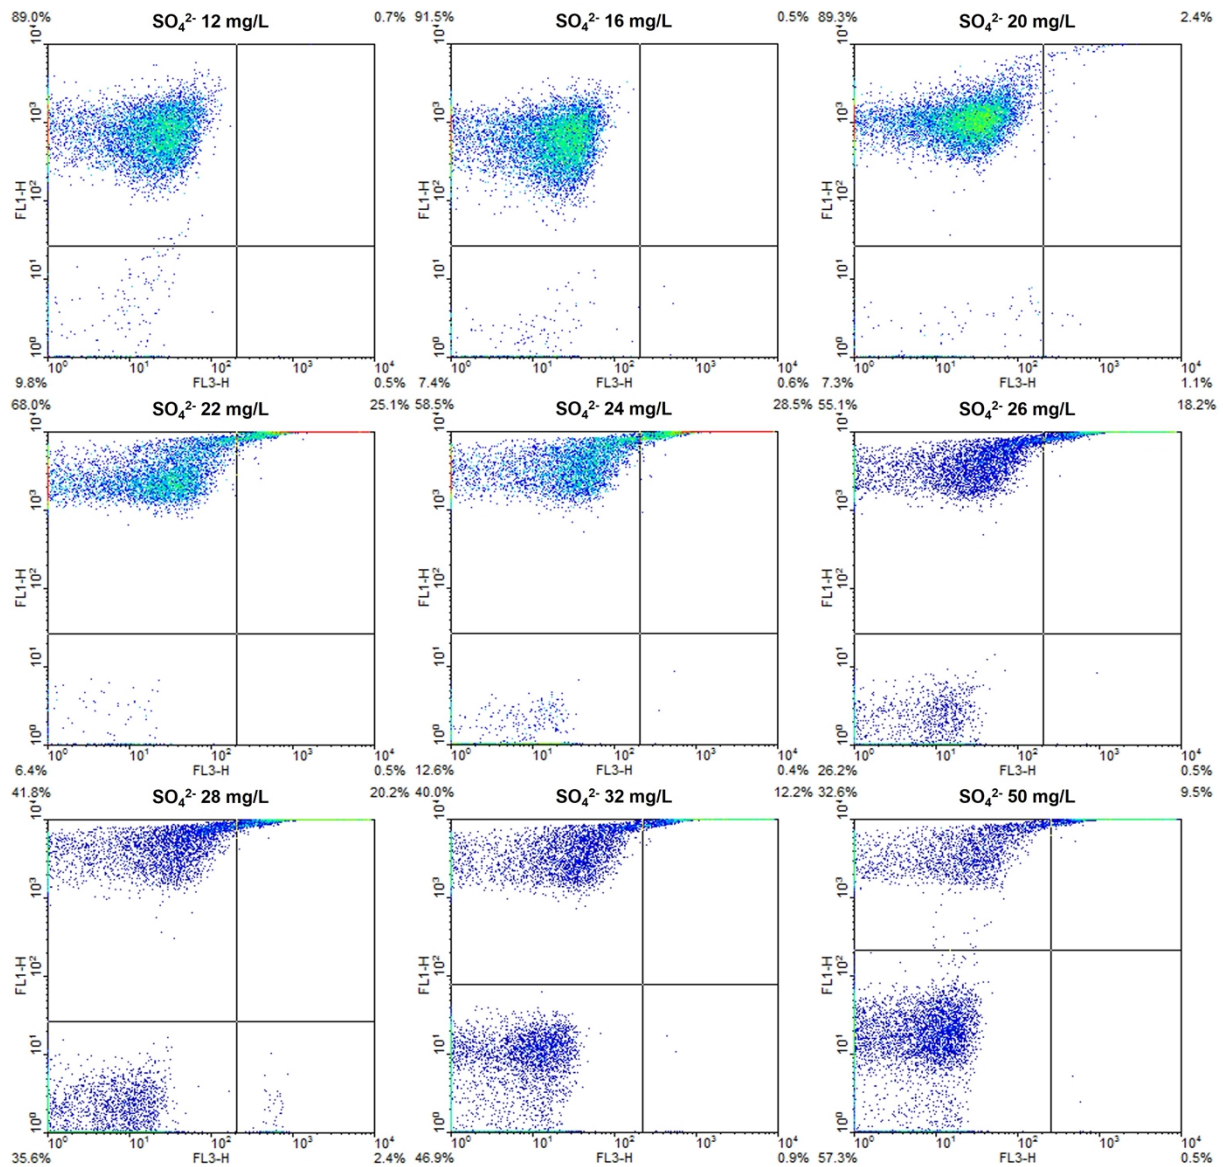

**Fig. S1.** Flow cytometry analysis of the dual staining with CFDA and PI of the population of *G. alkanivorans* strain 1B, from each steady state obtained with different initial sulfate concentrations (12 to 50 mg/L SO<sub>4</sub> using Na<sub>2</sub>SO<sub>4</sub>). Samples were collected in duplicate, and each was analyzed in triplicate.
